# Supplementary material
Source: PubMed Central journal article supplement (PMC7271362)
Supplement: ao0c01502_si_001.pdf [file ao0c01502_si_001.pdf]

**Title: Systems studies uncover miR-146a as a target in *Leishmania major* infection model**

**Supplementary Material**

**Prajakta Nimsarkar<sup>1</sup>, Prajakta Ingale<sup>1</sup> and Shailza Singh<sup>1\*</sup>**

**National Centre for Cell Science, NCCS Complex, Ganeshkhind, SP Pune University  
Campus, Pune-411007, INDIA**

**Algorithm : S1**

**KMP algorithm:**

```
# Python program for KMP Algorithm
import sys

fileNameGenome = "Genome.txt" # Name of the genome file

fileNamePrefix = "chr" #Name of chromosome files without number
startIndex = 1 # Start number of chromosome file
EndIndex = 36 # End number of chromosome file

#Read genome from file
fGenome = open(fileNameGenome, 'r')
txt = fGenome.readline()
#print(txt)
fGenome.close()

EndIndex += 1 # Increment the end index by 1 to cover last index
for x in range(startIndex, EndIndex):
    inputFileFileName = fileNamePrefix + str(x) + ".txt"
    #print("Input file name : " + inputFileFileName)
    fInput = open(inputFileFileName, 'r')
    searchHeader = fInput.readline()
    searchString = fInput.readline()
    fInput.close()
    #print("Input search String : " + searchString)
    #print(searchString)
    pat = searchString

    outputFileFileName = "SequenceFoundFor-" + inputFileFileName
    #print("Output file name : " + outputFileFileName)

    f = open(outputFileFileName, 'w')

    # write the search string in output file
    f.write("Found pattern for - \n" + searchHeader + "\n")

def KMPSearch(pat, txt):
    M = len(pat)
    N = len(txt)

    # create lps[] that will hold the longest prefix suffix
```

```

# values for pattern
lps = [0]*M
j = 0 # index for pat[]

# Preprocess the pattern (calculate lps[] array)
computeLPSArray(pat, M, lps)

i = 0 # index for txt[]
while i < N:
    if pat[j] == txt[i]:
        i += 1
        j += 1

    if j == M:
        #print >> f, "Found pattern AAAGTGCA at index " +
str(i-j)
        f.write("at index " + str(i-j) + "\n")
        j = lps[j-1]

    # mismatch after j matches
    elif i < N and pat[j] != txt[i]:
        # Do not match lps[0..lps[j-1]] characters,
        # they will match anyway
        if j != 0:
            j = lps[j-1]
        else:
            i += 1

def computeLPSArray(pat, M, lps):
    len = 0 # length of the previous longest prefix suffix

    lps[0] # lps[0] is always 0
    i = 1

    # the loop calculates lps[i] for i = 1 to M-1
    while i < M:
        if pat[i]==pat[len]:
            len += 1
            lps[i] = len
            i += 1
        else:
            # This is tricky. Consider the example.
            # AAACAAAA and i = 7. The idea is similar
            # to search step.
            if len != 0:
                len = lps[len-1]

            # Also, note that we do not increment i here
            else:
                lps[i] = 0
                i += 1

KMPSearch(pat, txt)
f.close()
#

```

**Table : S1****Differential Expression data:**

Read count matrix for miRNAs

| ID               | Sample_0Hr | Sample_3Hr | Sample_6Hr | Sample_12Hr | Sample_24Hr |
|------------------|------------|------------|------------|-------------|-------------|
| hsa-miR-21-5p    | 139567     | 83365      | 10791      | 140569      | 40939       |
| hsa-miR-16-5p    | 91852      | 77356      | 22838      | 103197      | 42125       |
| hsa-miR-30e-3p   | 78807      | 57710      | 663        | 3212        | 33020       |
| hsa-miR-30e-5p   | 78322      | 67048      | 9081       | 96582       | 37005       |
| hsa-miR-155-5p   | 74470      | 58280      | 21399      | 80473       | 32658       |
| hsa-miR-92a-3p   | 70898      | 76564      | 39430      | 94433       | 34342       |
| hsa-miR-191-5p   | 60036      | 61070      | 30493      | 78539       | 23170       |
| hsa-let-7b-5p    | 44540      | 35588      | 24437      | 41350       | 22005       |
| hsa-miR-9-5p     | 37604      | 34197      | 4338       | 47971       | 22051       |
| hsa-miR-101-3p   | 26644      | 16255      | 1036       | 17038       | 8600        |
| hsa-miR-25-3p    | 24015      | 21850      | 8212       | 29140       | 9853        |
| hsa-let-7f-5p    | 23033      | 18090      | 4156       | 30599       | 9350        |
| hsa-miR-142-3p   | 22318      | 14794      | 1091       | 23044       | 9172        |
| hsa-miR-30d-5p   | 19994      | 20724      | 7445       | 26122       | 7881        |
| hsa-miR-342-3p   | 18664      | 17461      | 8036       | 13081       | 7132        |
| hsa-miR-146b-5p  | 18363      | 20009      | 5893       | 21887       | 8119        |
| hsa-miR-29a-3p   | 17737      | 29684      | 7069       | 42442       | 15152       |
| hsa-miR-103b     | 15389      | 12780      | 3456       | 10240       | 5588        |
| hsa-miR-146a-5p  | 9982       | 10076      | 5409       | 39883       | 10807       |
| hsa-miR-30c-5p   | 9977       | 7062       | 3715       | 11516       | 4595        |
| hsa-miR-28-3p    | 7922       | 7192       | 4737       | 6947        | 3010        |
| hsa-miR-26b-5p   | 7543       | 5383       | 1205       | 2546        | 2930        |
| hsa-miR-148b-3p  | 6772       | 4036       | 1096       | 7430        | 2213        |
| hsa-miR-151a-3p  | 6707       | 5839       | 1987       | 8645        | 2292        |
| hsa-miR-425-5p   | 6686       | 5327       | 2987       | 7972        | 2706        |
| hsa-miR-99b-5p   | 6159       | 7394       | 6530       | 15804       | 2398        |
| hsa-miR-26a-5p   | 6033       | 5161       | 1294       | 6910        | 2821        |
| hsa-miR-221-3p   | 5564       | 10806      | 4337       | 10411       | 3761        |
| hsa-miR-30a-5p   | 5313       | 3732       | 1190       | 19336       | 588         |
| hsa-miR-378a-3p  | 5128       | 5234       | 1349       | 4637        | 2118        |
| hsa-miR-23a-3p   | 4823       | 1833       | 1883       | 5632        | 1229        |
| hsa-miR-140-3p   | 4813       | 5555       | 2733       | 4596        | 2607        |
| hsa-miR-4662a-5p | 4520       | 3876       | 18         | 5376        | 1222        |
| hsa-miR-132-3p   | 3829       | 3138       | 3684       | 3200        | 1371        |
| hsa-miR-532-5p   | 3638       | 3191       | 1248       | 4772        | 1350        |
| hsa-miR-181a-5p  | 3484       | 2858       | 623        | 2619        | 1120        |
| hsa-miR-125a-5p  | 3362       | 4312       | 3084       | 7068        | 1321        |
| hsa-miR-340-5p   | 3240       | 1730       | 12         | 2751        | 954         |
| hsa-miR-221-5p   | 3048       | 2723       | 1604       | 3366        | 826         |
| hsa-miR-100-5p   | 2917       | 1729       | 917        | 4448        | 389         |
| hsa-let-7a-3p    | 59         | 52         | 2          | 89          | 38          |
| hsa-miR-145-5p   | 2          | 1          | 0          | 3           | 3           |
| hsa-miR-146a-3p  | 28         | 41         | 11         | 117         | 44          |
| hsa-miR-155-3p   | 4          | 1          | 0          | 1           | 0           |
| hsa-miR-20a-3p   | 16         | 9          | 1          | 5           | 6           |
| hsa-miR-21-3p    | 179        | 167        | 19         | 296         | 109         |
| hsa-miR-30a-3p   | 721        | 10         | 10         | 37          | 77          |
| hsa-miR-9-3p     | 74         | 60         | 5          | 84          | 28          |

**Table S2:**

## Normalized\_Value\_Matrix

| miRNA_ID         | Sample_0Hr  | Sample_3Hr  | Sample_6Hr  | Sample_12Hr | Sample_24Hr |
|------------------|-------------|-------------|-------------|-------------|-------------|
| hsa-miR-21-5p    | 88647.63365 | 61625.474   | 25873.29013 | 77524.35312 | 60476.78643 |
| hsa-miR-16-5p    | 58340.88607 | 57183.47228 | 54758.05765 | 56913.549   | 62228.79475 |
| hsa-miR-30e-3p   | 50055.19976 | 42660.6622  | 1589.657248 | 1771.430559 | 48778.51164 |
| hsa-miR-30e-5p   | 49747.14627 | 49563.54322 | 21773.26918 | 53265.35063 | 54665.31869 |
| hsa-miR-155-5p   | 47300.50283 | 43082.02033 | 51307.80609 | 44381.17415 | 48243.75024 |
| hsa-miR-92a-3p   | 45031.70471 | 56598.00625 | 94540.24928 | 52080.16873 | 50731.42479 |
| hsa-miR-191-5p   | 38132.57671 | 45144.45747 | 73112.24502 | 43314.56559 | 34227.68367 |
| hsa-let-7b-5p    | 28290.10871 | 26307.53156 | 58591.93689 | 22804.68668 | 32506.69741 |
| hsa-miR-9-5p     | 23884.62614 | 25279.26989 | 10401.10579 | 26456.19407 | 32574.65052 |
| hsa-miR-101-3p   | 16923.25228 | 12016.09884 | 2483.989304 | 9396.523618 | 12704.2762  |
| hsa-miR-25-3p    | 15253.41178 | 16152.0615  | 19689.69128 | 16070.82394 | 14555.2597  |
| hsa-let-7f-5p    | 14629.68285 | 13372.57632 | 9964.729292 | 16875.46814 | 13812.20726 |
| hsa-miR-142-3p   | 14175.54213 | 10936.09143 | 2615.861323 | 12708.8561  | 13549.25829 |
| hsa-miR-30d-5p   | 12699.42599 | 15319.69439 | 17850.67603 | 14406.38514 | 11642.13962 |
| hsa-miR-342-3p   | 11854.66073 | 12907.60393 | 19267.70082 | 7214.222646 | 10535.6858  |
| hsa-miR-146b-5p  | 11663.47702 | 14791.14867 | 14129.48742 | 12070.76608 | 11993.72308 |
| hsa-miR-29a-3p   | 11265.8657  | 21943.14845 | 16949.15095 | 23406.92895 | 22383.16197 |
| hsa-miR-103b     | 9774.50568  | 9447.292721 | 8286.358141 | 5647.400038 | 8254.825046 |
| hsa-miR-146a-5p  | 6340.185568 | 7448.428909 | 12969.01365 | 21995.63044 | 15964.54801 |
| hsa-miR-30c-5p   | 6337.009758 | 5220.405415 | 8907.355467 | 6351.119027 | 6787.924318 |
| hsa-miR-28-3p    | 5031.75216  | 5316.504636 | 11357.77735 | 3831.297663 | 4446.496669 |
| hsa-miR-26b-5p   | 4791.02582  | 3979.247005 | 2889.196053 | 1404.128955 | 4328.317356 |
| hsa-miR-148b-3p  | 4301.316035 | 2983.511223 | 2627.849688 | 4097.674051 | 3269.135259 |
| hsa-miR-151a-3p  | 4260.030515 | 4316.333506 | 4764.176396 | 4767.751302 | 3385.837331 |
| hsa-miR-425-5p   | 4246.692116 | 3937.850417 | 7161.84947  | 4396.58917  | 3997.415278 |
| hsa-miR-99b-5p   | 3911.961822 | 5465.828042 | 15656.80517 | 8715.967793 | 3542.424921 |
| hsa-miR-26a-5p   | 3831.931429 | 3815.139103 | 3102.588957 | 3810.892018 | 4167.298041 |
| hsa-miR-221-3p   | 3534.040523 | 7988.063001 | 10398.70812 | 5741.707207 | 5555.904975 |
| hsa-miR-30a-5p   | 3374.614899 | 2758.786889 | 2853.230957 | 10663.8796  | 868.617954  |
| hsa-miR-378a-3p  | 3257.109957 | 3869.102512 | 3234.460976 | 2557.323631 | 3128.797324 |
| hsa-miR-23a-3p   | 3063.385593 | 1354.999026 | 4514.818397 | 3106.070021 | 1815.529703 |
| hsa-miR-140-3p   | 3057.033975 | 4106.393667 | 6552.840509 | 2534.71197  | 3851.168378 |
| hsa-miR-4662a-5p | 2870.931553 | 2865.235257 | 43.15811532 | 2964.88502  | 1805.189013 |
| hsa-miR-132-3p   | 2432.034716 | 2319.687368 | 8833.027602 | 1764.812512 | 2025.297985 |
| hsa-miR-532-5p   | 2310.718803 | 2358.866281 | 2992.295995 | 2631.776658 | 1994.275915 |
| hsa-miR-181a-5p  | 2212.903879 | 2112.704429 | 1493.750325 | 1444.38874  | 1654.510389 |
| hsa-miR-125a-5p  | 2135.414133 | 3187.537263 | 7394.423758 | 3898.029636 | 1951.435914 |
| hsa-miR-340-5p   | 2057.924388 | 1278.858874 | 28.77207688 | 1517.187256 | 1409.288313 |
| hsa-miR-221-5p   | 1935.973313 | 2012.909083 | 3845.867609 | 1856.362161 | 1220.201412 |
| hsa-miR-100-5p   | 1852.767111 | 1278.119649 | 2198.666208 | 2453.089392 | 574.6469118 |
| hsa-let-7a-3p    | 37.47454904 | 38.43968869 | 4.795346146 | 49.08384799 | 56.1351739  |
| hsa-miR-145-5p   | 1.270323696 | 0.739224783 | 0           | 1.65451173  | 4.431724255 |
| hsa-miR-146a-3p  | 17.78453175 | 30.30821609 | 26.37440381 | 64.52595747 | 64.99862241 |
| hsa-miR-155-3p   | 2.540647392 | 0.739224783 | 0           | 0.55150391  | 0           |
| hsa-miR-20a-3p   | 10.16258957 | 6.653023043 | 2.397673073 | 2.75751955  | 8.863448511 |
| hsa-miR-21-3p    | 113.6939708 | 123.4505387 | 45.55578839 | 163.2451574 | 161.0193146 |
| hsa-miR-30a-3p   | 457.9516925 | 7.392247826 | 23.97673073 | 20.40564467 | 113.7475892 |
| hsa-miR-9-3p     | 47.00197676 | 44.35348696 | 11.98836537 | 46.32632844 | 41.36275972 |
